# Supplementary material for: Pax3 expression enhances PDGF-B-induced brainstem gliomagenesis and characterizes a subset of brainstem glioma
Source: Springer Nature journal article supplement (doi:10.1186/s40478-014-0134-6), 2014-10-21

Figure S3

a

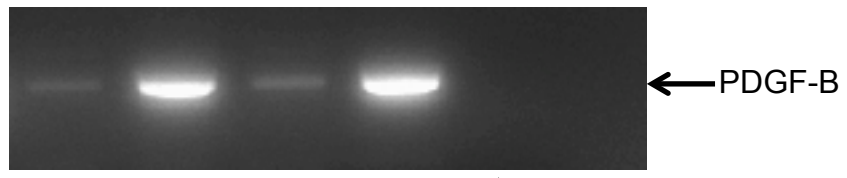

|        |   |   |   |   |       |
|--------|---|---|---|---|-------|
| RCAS-Y | + | + | + | - | RT-   |
| Pax3   | - | - | + | + | Water |
| PDGF-B | - | + | - | + |       |

b

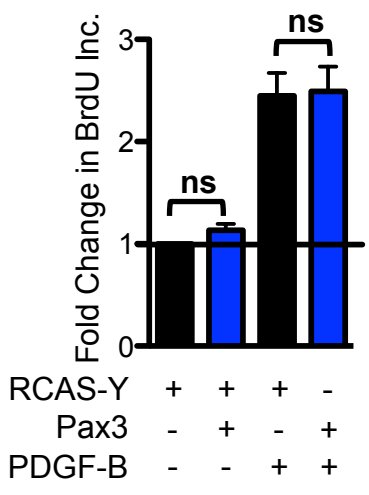

Supplement: 40478_2014_134_MOESM7_ESM.pdf [file 40478_2014_134_MOESM7_ESM.pdf]
