# Supplementary material for: Pax3 expression enhances PDGF-B-induced brainstem gliomagenesis and characterizes a subset of brainstem glioma
Source: Springer Nature journal article supplement (doi:10.1186/s40478-014-0134-6), 2014-10-21

Figure S5

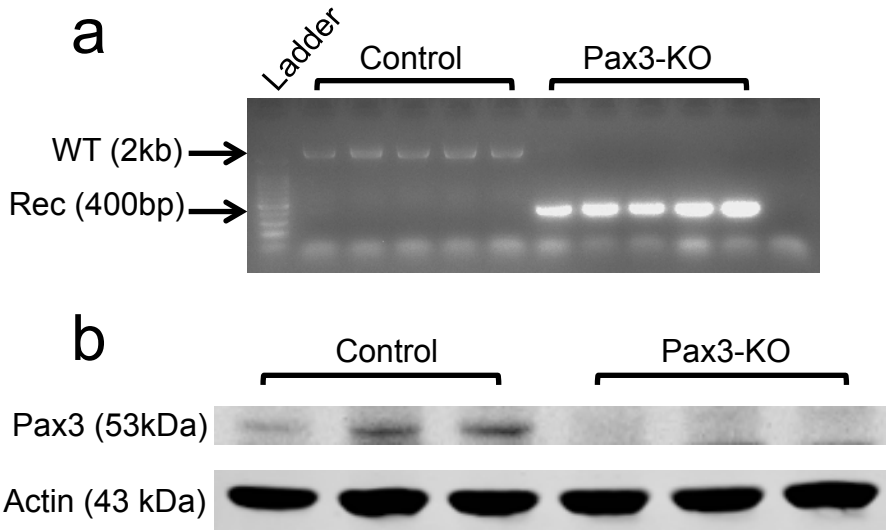

Supplement: 40478_2014_134_MOESM9_ESM.pdf [file 40478_2014_134_MOESM9_ESM.pdf]
